# Supplementary material for: College from home during COVID-19: A mixed-methods study of heterogeneous experiences
Source: PubMed Central journal article supplement (PMC8238179; doi:10.1371/journal.pone.0251580), 2021-06-28
Supplement: pone.0251580.s013.pdf [file pone.0251580.s013.pdf]

PONE-D-20-34654

College from home during COVID-19: A mixed-methods study of heterogeneous experiences  
PLOS ONE

Thank you for the opportunity to revise and resubmit our manuscript. We appreciate the thoughtful review of this work. Below, we address the concerns raised in the review.

## **Editorial issues and disclosures (grants, funding roles)**

### **D1. Formatting**

We have reformatted the main body of the manuscript and the tables to comply with PLOS ONE guidelines.

### **D2.a. Amended financial disclosures**

In the cover letter, we include an updated funding statement clarifying commercial involvement (below).

*“This material is based upon work supported by the National Science Foundation under Grant Nos. EDA-2009977 awarded to JM, PN, AD, and ER, CHS-2016365, and CHS-1941537, awarded to JM. Funding was also provided through a grant from Samsung awarded to JM, PN, AD, and ER.*

*KSK (the second author) was supported by a National Research Service Award from the National Institute of Mental Health (F31MH117827).*

*Additional support came from a Google Security and Privacy unrestricted gift awarded to JM that provided consulting income for researcher MM. SC, a researcher at Google, is an author on this paper who contributed to study design, analysis, and manuscript preparation. The specific role of this author is articulated in the ‘author contributions’ section. The manuscript was approved by an internal Google review.”*

### **D2.b. Updated competing interests statement declaring a commercial affiliation**

The support received from Google, the involvement of a researcher employed by Google, and the grant from Samsung do not alter our adherence to PLOS ONE policies on sharing data and materials.

### **D3. Grant information in the ‘Funding Information’ and ‘Financial Disclosure’ sections**

The funding from Samsung and Google is now reported in the Funding Information section. There are no grant numbers for these awards.

### **R2.1 Time 1 versus Time 2 as a point of comparison**

R2 raised the concern about the use of Time 1 as the comparison point across years, pointing out that March may have been too early to detect adverse consequences of the pandemic.

We thank R2 for raising this concern. In response, we reran the yearly comparisons based on data from the Time 2 surveys (collected in June of each year). The results were nearly identical suggesting that levels of depression, stress, anxiety, and loneliness were not higher in June of 2020 than in June of 2019. We have added the sentences below to the manuscript and have deleted the two sentences in the limitations that pointed out this issue (Revised Manuscript with Track Changes lines 904-906).

*“Time 2 comparisons from 2019 and 2020 similarly indicates no yearly differences in depressive symptoms, anxiety, stress, or loneliness.”* (Manuscript lines 256-257; Revised Manuscript with Track Changes lines 262-263).

*“There were no within-person changes in Time 1 depressive symptoms, stress, or loneliness nor were there any within-person differences in any of these variables, including anxiety, in Time 2 data.”* (Manuscript lines 260-262; Revised Manuscript with Track Changes lines 266-268).

**R2.2 Labeling of academic terms.**

R2 pointed out that references to autumn and spring terms may confuse readers located outside the Northern hemisphere.

To address this potential confusion, we have added dates of the Winter and Spring terms to Table 1, described in R2.3.

We think the single seasonal label in the text (Spring term) will be less cumbersome for readers than a month and date combination.

**R2.3 Clarification of pandemic timeline and local response**

R2’s suggested that we describe the local and university responses to the pandemic.

In response, we added a timeline to provide context for our findings (Table 1; Manuscript line 133; Revised Manuscript with Track Changes line 136).

**Table 1. Timeline of Local Response to the Pandemic**

| <b>Date</b>                      | <b>Event</b>                                                                                                                                            |
|----------------------------------|---------------------------------------------------------------------------------------------------------------------------------------------------------|
| 2/28/2020                        | Alerts about local community spread of COVID-19.                                                                                                        |
| 3/6/2020                         | University announced shift to online learning for the remainder of Winter term (6 January 2020 - 20 March 2020)                                         |
| 3/13/2020                        | University announced that Spring term (30 March 2020 - 12 June 2020) would begin online. Statewide ban on large gatherings and closure of K-12 schools. |
| 3/18/2020                        | University announced that all of Spring term would be online                                                                                            |
| 3/23/2020                        | Statewide stay-at-home order issued.                                                                                                                    |
| 5/4/2020 - present (March, 2021) | Phased restrictions on in-person contact, based on county public health metrics. Classes remained online for the entire 2020-2021 academic year.        |

**R2.4 Measurement differences in predictor and dependent variables**

R2 asked for clarification on how we reconciled different Likert Scale ratings.

We thank R2 for the opportunity to clarify. For most of the comparisons, we standardized the variables before analyzing the data to account for measurement differences. The coefficients represent standard deviation units rather than the Likert scale ratings, allowing comparison

of variables measured on different scales. The models reported in Table 2 are the only ones with unstandardized data. The variables used in these analyses are counts representing the number of active coping behaviors relative to maladaptive. The unstandardized variables allow the reader to see the relative change in distress indicators for each additional adaptive behavior relative to maladaptive ones. These decisions do not change the p-value; they affect only the magnitude of the coefficient. Since we refrain from comparing coefficients across models, we believe that these analytic decisions are sound and provide the reader with the most understandable metrics.

## **R2.5. Limitations of self-report**

R2 mentioned that self-report data is often called into question and asked about how we handled concerns about self-report data in our analysis.

We appreciate R2's concern about self-reported data. We note this as a limitation: "This exploratory study of college student experiences during the pandemic was limited by the self-report nature of assessments, time-based measures as a proxy for pandemic effects, and a college sample ... Students' evaluation of their effectiveness in coping was not benchmarked with objective measures such as grade point average." (Manuscript lines 860-865; Revised Manuscript with Track Changes lines 889-894)

While coping effectiveness may be less objectively assessed in self-report than by external measures such as grades, internal states such as stress and mood are best assessed by self-report (Stone, 2000). Additionally, a review of the empirical literature on the validity of self-reported health-risk behaviors concludes "self-reported data are accurate when individuals understand the questions and when there is a strong sense of anonymity and little fear of reprisal" (Brener, Billy, & Grady, 2003). Since all survey responses were kept confidential in this study, we have no reason to suspect that participants would be prone to bias their responses. Finally, we tested for the reliability and validity of the self-reported data and include these statistics in the measures section. All measures demonstrate strong psychometric properties, pointing to evidence of minimal response bias.

One limitation of self-reported internal states concerns retrospective bias, in which recent experiences dominate recall (Tourangeau, 1999). We address this bias through the use of experience sampling methods (ESM) which prompt individuals to describe current and very recent states (Trull & Ebner-Priemer, 2009). Comparisons between ESM data and traditional self-reports find poor to moderate agreement, suggesting inaccuracies in recall of mood and coping styles over long time periods (Stone et al., 1998; Solhan, Trull, Jahng, & Wood, 2009). Our use of ESM may therefore provide a more accurate description of participants' psychological functioning and coping behaviors than methods relying on retrospective recall.

### References:

- Brener, N. D., Billy, J. O., & Grady, W. R. (2003). Assessment of factors affecting the validity of self-reported health-risk behavior among adolescents: Evidence from the scientific literature. *Journal of Adolescent Health, 33*(6), 436-457.
- Solhan, M. B., Trull, T. J., Jahng, S., & Wood, P. K. (2009). Clinical assessment of affective instability: comparing EMA indices, questionnaire reports, and retrospective recall. *Psychological Assessment, 21*(3), 425.
- Stone, A. A. (2000). *The science of self-report: Implications for research and practice*. Mahwah, NJ: Lawrence Erlbaum.
- Stone, A. A., Schwartz, J. E., Neale, J. M., Shiffman, S., Marco, C. A., Hickcox, M., ... & Cruise, L. J. (1998). A comparison of coping assessed by ecological momentary assessment and retrospective recall. *Journal of Personality and Social Psychology, 74*(6), 1670.

- Tourangeau, R. (1999). Remembering what happened: Memory errors and survey reports. In *The science of self-report* (pp. 41–60). Psychology Press.
- Trull, T. J., & Ebner-Priemer, U. W. (2009). Using experience sampling methods/ecological momentary assessment (ESM/EMA) in clinical assessment and clinical research: introduction to the special section. *Psychological Assessment, 21*(4), 457–462. <https://doi.org/10.1037/a0017653>

## **R2.6 Organization of qualitative themes by challenges and strategies**

R2 asked why we chose to organize themes by challenges and strategies.

To some extent, this structure flowed from the objective of this study. We sought to learn about students' experiences during the pandemic -- widely recognized as a challenge for students and other populations. In-depth interviews allowed us to characterize those challenges and illustrate how these are contextualized in students' daily lives. Students' detailed descriptions of their attempts to learn and communicate in this context illuminated their strategies for academic engagement and psychosocial wellbeing. In the course of analysis, we recognized that most of the content and most of the codes related either to challenges that students faced or how they were coping with those challenges, so it was a natural framework for presenting the themes. We differentiated sets of students' strategies and described them in detail with the idea that they could inform thinking about interventions.

## **R2.8 Inclusion of the interview protocol**

The interview protocol has been added to the repository, as requested by R2.

[https://github.com/kskuehn/UWEXP\\_COVID/blob/main/Interview%20Guide%20for%20PLOS%20ONE%20repository.docx](https://github.com/kskuehn/UWEXP_COVID/blob/main/Interview%20Guide%20for%20PLOS%20ONE%20repository.docx)

## **R2.9 Confusion around whether or not CBT was delivered to participants**

R2 requested clarification about CBT offered in this study.

This study did not involve any treatment or skills training. We do propose broader dissemination of skills training offered in CBT and DBT modalities, based on the findings that active coping was associated with lower depression ratings as well as higher ratings of perceived effectiveness in coping. We have reworded the manuscript for clarity. The original text *"To help students develop effective coping skills, the training offered in cognitive behavioral therapy and dialectical behavioral therapies could be made broadly accessible."* has been revised to *"To help students develop effective coping skills, the skills training that is commonly part of cognitive behavioral and dialectical behavioral therapies could be offered to all students, not just those in treatment for mental health concerns."* (Manuscript lines 849-852; Revised Manuscript with Track Changes lines 877-880).

## **R2.10 Connection between final discussion points and study findings**

R2 raised the issue of whether our final discussion points followed from our findings.

We edited the final paragraph of the discussion to clarify the link with our results. The sentence, *"Rather than relying on a one-size-fits-all approach to supporting students who are participating in college remotely, interventions may need to be tailored and prioritized for different individuals, keeping in mind the context for their struggles."*

is now worded:

*“Rather than relying on a one-size-fits-all approach to supporting students who are participating in college remotely, our findings of heterogeneity underscore the importance of tailoring interventions, keeping in mind the context for their struggles.”*  
(Manuscript line 843; Revised Manuscript with Track Changes line 870).

We have confirmed that the remaining discussion points are rooted in our analysis.

## **R2.11. Production errors and typos**

We reviewed the document and corrected errors. Those corrections are marked.

### **Additional changes**

Two minor statistical corrections were made, described below. These do not alter the major findings or the points highlighted in the discussion.

In the initial draft, when providing the summary statistics for between-person coping as a predictor of distress during the 2020 Spring term, we accidentally reported the results for the Perceived Stress Scale-4 (PSS-4) instead of the Stress Severity Ratings. This error did not affect Figure 3 or the conclusions, which were rightly based on the Stress Severity item. This error has been in this revised submission (Manuscript lines 256-257; Revised Manuscript with Track Changes lines 262-263).

We also noticed that in the initial submission the coping models that predicted academic stress were erroneously reported from a mixed-effects model without the random time effect included. It was determined from fit indices (i.e., AIC and BIC) that this effect should be included and it was included in all of our other coping models. We therefore applied the model with the random effect to the ‘Coping comparisons during Spring 2020 term’ section. With this correction, the between-person problem-focused coping no longer predicted increased academic stress (as it had been reported in the initial submission). The corrected text reports the adjustment (Manuscript lines 343-344; Revised Manuscript with Track Changes lines 354-355).

For clarification, several variables initially only reported in S5 table were added to the text (Manuscript lines 268-272; Revised Manuscript with Track Changes lines 275-279) to describe the small changes in reported distress over the Spring 2020 term.

Some stylistic changes were made for clarity and one supporting reference was added. Those edits are marked in the manuscript.

One co-author, accidentally omitted in the initial submission, has been added. That change was made in the portal and the title page.
